# Supplementary material for: Efficient depletion of ribosomal RNA for RNA sequencing in planarians
Source: PubMed Central journal article supplement (PMC6884822; doi:10.1186/s12864-019-6292-y), 2019-11-29

**A**

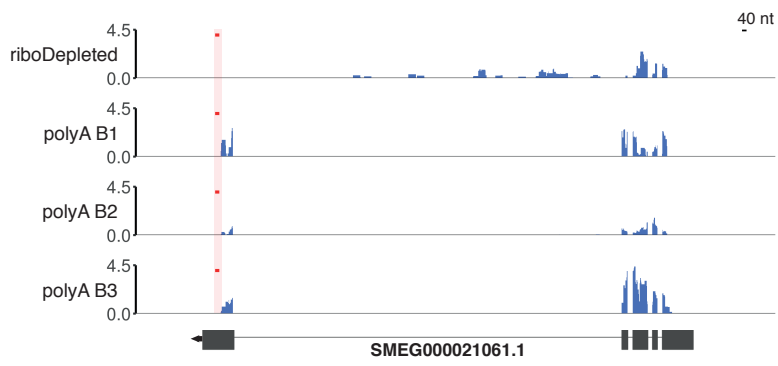

**B**

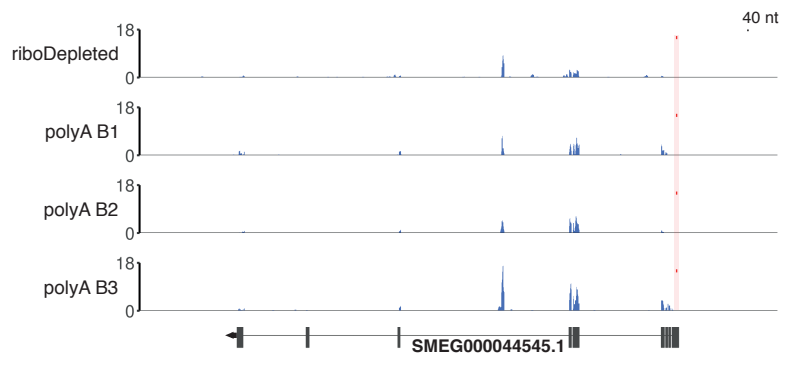

**C**

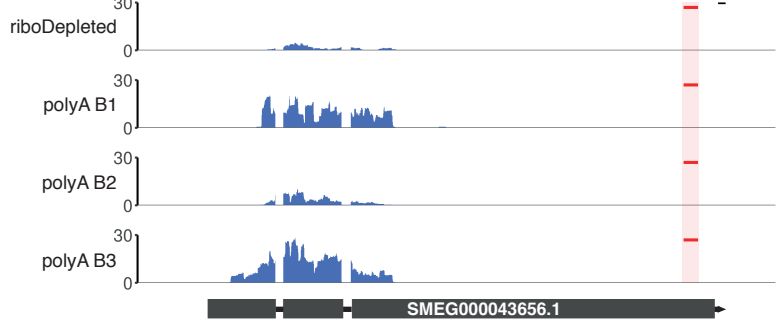

**D**

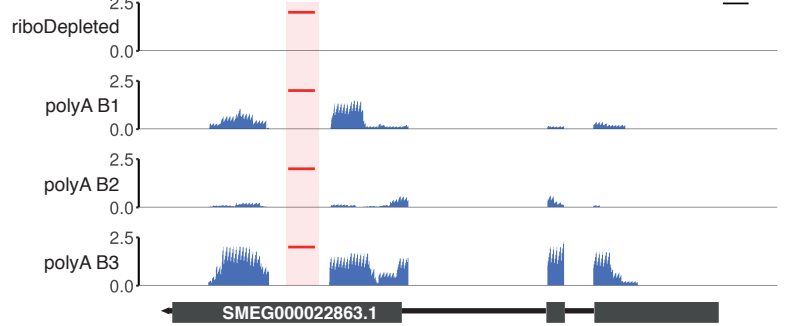

Supplement: 12864_2019_6292_MOESM2_ESM.pdf [file 12864_2019_6292_MOESM2_ESM.pdf]
